# Supplementary material for: A theoretical study of the monolayer-protected gold cluster Au317(SR)110
Source: Royal Society of Chemistry journal article supplement (doi:10.1039/d2nr00114d), 2022-01-01
Supplement: d2nr00114d1.pdf [file d2nr00114d1.pdf]

**Supplementary Materials**

# Theoretical Study of Monolayer Protected Gold Cluster $\text{Au}_{317}(\text{SR})_{110}$

Lanyan Li<sup>a</sup>, Pu Wang<sup>\*a,b</sup> and Yong Pei<sup>\*a</sup>

*<sup>a</sup>Department of Chemistry, Key Laboratory for Green Organic Synthesis and Application of Hunan Province, Key Laboratory of Environmentally Friendly Chemistry and Applications of Ministry of Education, Xiangtan University, Hunan Province 411105, China <sup>b</sup> Foshan Green Intelligent Manufacturing Research Institute of Xiangtan University, Guangdong province, China, 5283311*

### RT-TDDFT Calculation Details:

Except for TD-DFT calculation using the Octopus software, we also carried out real-time TD-DFT calculations to obtain the optical absorption spectra.<sup>1</sup> The CP2K code is adopted to carry out RT-TDDFT calculations.<sup>2</sup> The Perdew–Burke–Ernzerhof (PBE) functional<sup>3</sup> with DZVP-MOLOPT and DZVP-MOLOPT-SR basis set<sup>4</sup> and Goedecker-Teter-Hutter (GTH) pseudopotentials<sup>5</sup> were used to optimize the geometry structure. In the RT-TDDFT calculation, electrical pulses with an intensity of 0.005 a.u. are applied in each of the three Cartesian directions. The time interval is 0.012 fs, and following the electron dynamics for a total of 9 fs. The obtained UV-vis spectra of the three clusters was shown in Figure S1. The Au<sub>246</sub>(SR)<sub>80</sub> shows an adsorption peaks located at 622 nm. The Au<sub>317</sub>(SH)<sub>110</sub> and Au<sub>279</sub>(SR)<sub>84</sub> nanocluster exhibits adsorption peak at 595 and 600 nm, respectively.

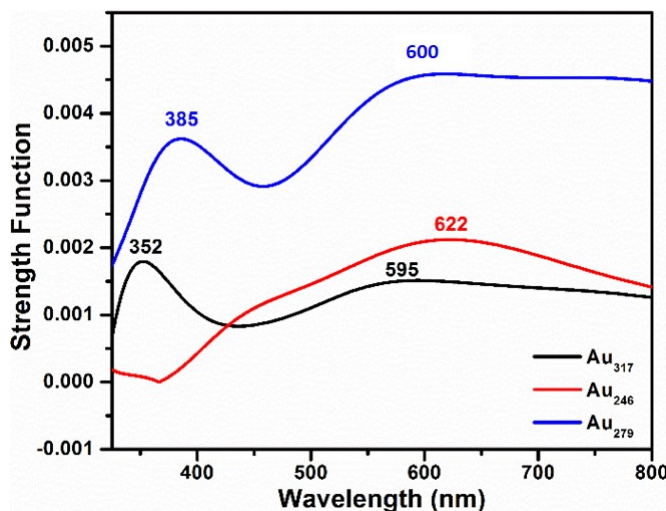

**Figure S1.** Simulated UV-vis absorption spectra of Au<sub>317</sub>(SH)<sub>110</sub>, Au<sub>246</sub>(SH)<sub>80</sub> and Au<sub>279</sub>(SH)<sub>84</sub> clusters by RT-TDDFT approach.

### Details of the Au<sub>329</sub>(SH)<sub>84</sub> model:

The Au<sub>329</sub>(SH)<sub>84</sub> model was constructed based on the Au<sub>260</sub> core reported previously.<sup>6</sup> The ligand layer consists of 31 monomeric [SR-Au-SR] motifs and 22 SR motifs (Figure S2). The simulated radial distribution functions of Au<sub>317</sub>(SH)<sub>110</sub> and Au<sub>329</sub>(SH)<sub>84</sub> clusters are compared in Figure S3a. The Au<sub>317</sub> cluster exhibits split double peaks centered at 2.87 and 2.97 Å, respectively. In contrast, the first dominant g(r) peak of Au<sub>329</sub> centered at around 2.96 Å, which is similar to the shape and position of Au<sub>246</sub> and Au<sub>279</sub>. As shown in Figure S3b, the two clusters demonstrated different powder X-ray diffraction curve shapes. The peak of Au<sub>329</sub> cluster is similar to Au<sub>279</sub> cluster in Figure 2b.

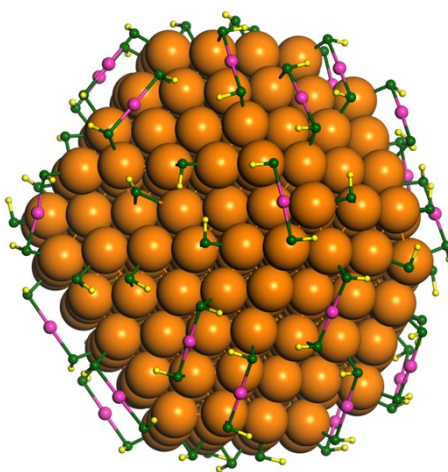

**Figure S2.** The optimized structure of the Au<sub>329</sub>(SH)<sub>84</sub>. Orange, pink, green and yellow balls represent Au, Au, S and H atoms, respectively.

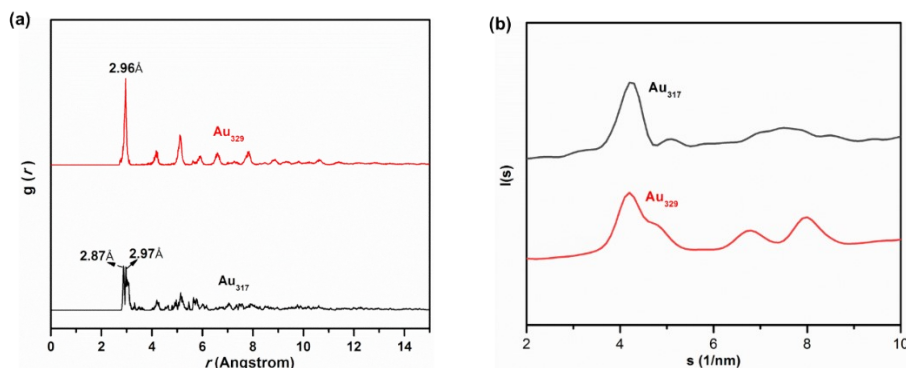

**Figure S3.** (a) The simulated radial distribution functions of Au<sub>317</sub> and constructed Au<sub>329</sub> clusters. (b) The powder X-ray diffraction curve of Au<sub>317</sub> and constructed Au<sub>329</sub> clusters simulated based on the Debye formula.

**Table S1.** The averaged formation energy of gold clusters with number of gold atoms exceeds 100.

| Number | Molecular formula                     | $N_{\text{Au}}:N_{\text{SR}}$ | $ E_{\text{ave}} $ (eV) |
|--------|---------------------------------------|-------------------------------|-------------------------|
| 1      | $\text{Au}_{102}(\text{SCH}_3)_{44}$  | 2.3182                        | 2.7320                  |
| 2      | $\text{Au}_{144}(\text{SCH}_3)_{60}$  | 2.4000                        | 2.7653                  |
| 3      | $\text{Au}_{133}(\text{SCH}_3)_{52}$  | 2.5577                        | 2.7655                  |
| 4      | $\text{Au}_{146}(\text{SCH}_3)_{57}$  | 2.5614                        | 2.7718                  |
| 5      | $\text{Au}_{130}(\text{SCH}_3)_{50}$  | 2.6000                        | 2.7831                  |
| 6      | $\text{Au}_{191}(\text{SCH}_3)_{66}$  | 2.8939                        | 2.8158                  |
| 7      | $\text{Au}_{246}(\text{SCH}_3)_{80}$  | 3.0750                        | 2.8468                  |
| 8      | $\text{Au}_{279}(\text{SCH}_3)_{84}$  | 3.3214                        | 2.8727                  |
| 9      | $\text{Au}_{317}(\text{SCH}_3)_{110}$ | 2.8818                        | 2.8261                  |

## REFERENCE

- [1] K. Yabana, G. F. Bertsch, *Phys. Rev. B* 1996, **54**, 4484-4487.
- [2] J. Hutter, M. Iannuzzi, F. Schiffmann, J. VandeVondele, *WIREs Comput. Mol. Sci.* 2014, **4**, 15-25.
- [3] J. P. Perdew, K. Burke, M. Ernzerhof, *Phys. Rev. Lett.* 1996, **77**, 3865-3868.
- [4] J. VandeVondele, J. Hutter, *J. Chem. Phys.* 2007, **127**, 114105.
- [5] S. Goedecker, M. Teter, J. Hutter, *Phys. Rev. B* 1996, **54**, 1703-1710.
- [6] C. Kumara, X. Zuo, J. Ilavsky, D. Cullen, A. Dass, *J. Phys. Chem. C*, 2015 **119**, 11260-11266.
